# Supplementary material for: Calculation of chemical-shift tensors of heavy nuclei: a DFT/ZORA investigation of 199Hg chemical-shift tensors in solids, and the effects of cluster size and electronic-state approximations
Source: Royal Society of Chemistry journal article supplement (doi:10.1039/c4cp01682c), 2014-01-01
Supplement: c4cp01682c1.pdf [file c4cp01682c1.pdf]

Supporting information for

Calculation of Chemical-Shift Tensors of Heavy Nuclei:

A DFT/ZORA Investigation of  $^{199}\text{Hg}$  Chemical-Shift Tensors in Solids, and the Effects  
of Cluster Size and Electronic-State Approximations

Fahri Alkan and C. Dybowski

**Table S1. Calculated NMR Chemical Shieldings for  
Small and Large Model Clusters of  $^{199}\text{Hg}$  Solids.**

| <b>Model clusters</b>               | <b><math>\sigma_{11}</math><br/>(ppm)</b> | <b><math>\sigma_{22}</math><br/>(ppm)</b> | <b><math>\sigma_{33}</math><br/>(ppm)</b> |
|-------------------------------------|-------------------------------------------|-------------------------------------------|-------------------------------------------|
| <b>Hg(SCN)<sub>2</sub></b>          |                                           |                                           |                                           |
| Small Cluster                       | 7505                                      | 8998                                      | 12511                                     |
| Large Cluster                       | 7847                                      | 8540                                      | 11677                                     |
| <b>Hg(CN)<sub>2</sub></b>           |                                           |                                           |                                           |
| Small Cluster                       | 7954                                      | 7958                                      | 13301                                     |
| Large Cluster                       | 7992                                      | 8046                                      | 12092                                     |
| <b>Hg(SeCN)<sub>2</sub></b>         |                                           |                                           |                                           |
| Small Cluster                       | 8465                                      | 9020                                      | 12418                                     |
| Large Cluster                       | 8542                                      | 9371                                      | 11450                                     |
| <b>Hg(Acetate)<sub>2</sub></b>      |                                           |                                           |                                           |
| Small Cluster                       | 9596                                      | 9890                                      | 12505                                     |
| Large Cluster                       | 9975                                      | 10102                                     | 11653                                     |
| <b>HgF<sub>2</sub></b>              |                                           |                                           |                                           |
| Small Cluster                       | 11578                                     | 11578                                     | 11578                                     |
| Large Cluster                       | 10887                                     | 10888                                     | 10888                                     |
| <b>HgCl<sub>2</sub></b>             |                                           |                                           |                                           |
| Small Cluster                       | 7987                                      | 7987                                      | 13181                                     |
| Large Cluster                       | 8284                                      | 8340                                      | 12319                                     |
| <b>HgBr<sub>2</sub></b>             |                                           |                                           |                                           |
| Small Cluster                       | 9964                                      | 9965                                      | 13142                                     |
| Large Cluster                       | 9926                                      | 9957                                      | 11398                                     |
| <b>HgI<sub>2</sub></b>              |                                           |                                           |                                           |
| Small Cluster                       | 11444                                     | 12293                                     | 12348                                     |
| Large Cluster                       | 10710                                     | 10750                                     | 11296                                     |
| <b>Hg<sub>2</sub>Cl<sub>2</sub></b> |                                           |                                           |                                           |
| Small Cluster <u>Hg(1)</u>          | 7683                                      | 7683                                      | 13203                                     |
| Small Cluster <u>Hg(2)</u>          | 7683                                      | 7683                                      | 13203                                     |
| Large Cluster <u>Hg(1)</u>          | 8031                                      | 8031                                      | 11612                                     |
| Large Cluster <u>Hg(2)</u>          | 8002                                      | 8002                                      | 11612                                     |

|                                                       |      |      |       |
|-------------------------------------------------------|------|------|-------|
| <b>K[Hg(SCN)<sub>3</sub>]</b>                         |      |      |       |
| Small Cluster                                         | 8021 | 8557 | 10208 |
| Large Cluster                                         | 7883 | 8243 | 9837  |
| <b>Hg<sub>2</sub>(H<sub>2</sub>O)·2NO<sub>3</sub></b> |      |      |       |
| Small Cluster <u>Hg(1)</u>                            | 9455 | 9516 | 13027 |
| Small Cluster <u>Hg(2)</u>                            | 9392 | 9497 | 13027 |
| Large Cluster <u>Hg(1)</u>                            | 9024 | 9113 | 12069 |
| Large Cluster <u>Hg(2)</u>                            | 8849 | 9126 | 12066 |

**Table S2. Frozen Inner Shells in FCA(TZP)/AE and FCA(DZ)/AE Basis Sets for the Elements in Large Clusters.**

| <b>Elements</b> | <b>Frozen Core Orbitals*</b> |
|-----------------|------------------------------|
| Hg              | [...]4f                      |
| S, Cl           | [...]2p                      |
| C, N, O, F      | [...]1s                      |
| Se, Br          | [...]3p                      |
| I               | [...]4p                      |

\*Frozen inner shells are up to and including the listed orbitals for the given elements.

**Table S3. Calculated NMR Chemical Shieldings of Large Clusters with FCA/TZP and FCA/DZ level of basis sets.**

| <b>Model clusters</b>                                 | <b><math>\sigma_{11}</math><br/>(ppm)</b> | <b><math>\sigma_{22}</math><br/>(ppm)</b> | <b><math>\sigma_{33}</math><br/>(ppm)</b> |
|-------------------------------------------------------|-------------------------------------------|-------------------------------------------|-------------------------------------------|
| <b>Hg(SCN)<sub>2</sub></b>                            |                                           |                                           |                                           |
| FCA(TZP)/AE                                           | 7860                                      | 8554                                      | 11670                                     |
| FCA(DZ)/AE                                            | 7880                                      | 8640                                      | 11646                                     |
| <b>Hg(CN)<sub>2</sub></b>                             |                                           |                                           |                                           |
| FCA(TZP)/AE                                           | 8003                                      | 8044                                      | 12102                                     |
| FCA(DZ)/AE                                            | 8058                                      | 8100                                      | 12127                                     |
| <b>Hg(SeCN)<sub>2</sub></b>                           |                                           |                                           |                                           |
| FCA(TZP)/AE                                           | 8535                                      | 9377                                      | 11464                                     |
| FCA(DZ)/AE                                            | 8599                                      | 9333                                      | 11574                                     |
| <b>Hg(Acetate)<sub>2</sub></b>                        |                                           |                                           |                                           |
| FCA(TZP)/AE                                           | 9975                                      | 10100                                     | 11656                                     |
| FCA(DZ)/AE                                            | 9980                                      | 10101                                     | 11749                                     |
| <b>HgF<sub>2</sub></b>                                |                                           |                                           |                                           |
| FCA(TZP)/AE                                           | 10831                                     | 10832                                     | 10832                                     |
| FCA(DZ)/AE                                            | 10901                                     | 10902                                     | 10902                                     |
| <b>HgCl<sub>2</sub></b>                               |                                           |                                           |                                           |
| FCA(TZP)/AE                                           | 8286                                      | 8362                                      | 12326                                     |
| FCA(DZ)/AE                                            | 8334                                      | 8400                                      | 12355                                     |
| <b>HgBr<sub>2</sub></b>                               |                                           |                                           |                                           |
| FCA(TZP)/AE                                           | 9935                                      | 9962                                      | 11353                                     |
| FCA(DZ)/AE                                            | 9939                                      | 9967                                      | 11455                                     |
| <b>HgI<sub>2</sub></b>                                |                                           |                                           |                                           |
| FCA(TZP)/AE                                           | 10709                                     | 10753                                     | 11197                                     |
| FCA(DZ)/AE                                            | 10637                                     | 10677                                     | 11088                                     |
| <b>Hg<sub>2</sub>Cl<sub>2</sub></b>                   |                                           |                                           |                                           |
| FCA(TZP)/AE <u>Hg(1)</u>                              | 8058                                      | 8058                                      | 11609                                     |
| FCA(TZP)/AE <u>Hg(2)</u>                              | 8028                                      | 8028                                      | 11609                                     |
| FCA(DZ)/AE <u>Hg(1)</u>                               | 8108                                      | 8108                                      | 11744                                     |
| FCA(DZ)/AE <u>Hg(2)</u>                               | 8092                                      | 8092                                      | 11744                                     |
| <b>K[Hg(SCN)<sub>3</sub>]</b>                         |                                           |                                           |                                           |
| FCA(TZP)/AE                                           | 7893                                      | 8263                                      | 9848                                      |
| FCA(DZ)/AE                                            | 7875                                      | 8306                                      | 9845                                      |
| <b>Hg<sub>2</sub>(H<sub>2</sub>O)·2NO<sub>3</sub></b> |                                           |                                           |                                           |
| FCA(TZP)/AE <u>Hg(1)</u>                              | 9041                                      | 9116                                      | 12093                                     |
| FCA(TZP)/AE <u>Hg(2)</u>                              | 8869                                      | 9137                                      | 12089                                     |
| FCA(DZ)/AE <u>Hg(1)</u>                               | 9069                                      | 9093                                      | 12101                                     |
| FCA(DZ)/AE <u>Hg(2)</u>                               | 8901                                      | 9163                                      | 12102                                     |

**Table S4. Calculated NMR Chemical Shieldings of Large Clusters with ZORA/Scalar and Nonrelativistic level of theory.**

| <b>Model clusters</b>                                 | <b><math>\sigma_{11}</math><br/>(ppm)</b> | <b><math>\sigma_{22}</math><br/>(ppm)</b> | <b><math>\sigma_{33}</math><br/>(ppm)</b> |
|-------------------------------------------------------|-------------------------------------------|-------------------------------------------|-------------------------------------------|
| <b>Hg(SCN)<sub>2</sub></b>                            |                                           |                                           |                                           |
| ZORA/Scalar                                           | 6162                                      | 6172                                      | 8607                                      |
| Nonrelativistic                                       | 6366                                      | 6535                                      | 8702                                      |
| <b>Hg(CN)<sub>2</sub></b>                             |                                           |                                           |                                           |
| ZORA/Scalar                                           | 5643                                      | 5666                                      | 8914                                      |
| Nonrelativistic                                       | 6190                                      | 6221                                      | 8971                                      |
| <b>Hg(SeCN)<sub>2</sub></b>                           |                                           |                                           |                                           |
| ZORA/Scalar                                           | 6049                                      | 6224                                      | 8507                                      |
| Nonrelativistic                                       | 6115                                      | 6455                                      | 8707                                      |
| <b>Hg(Acetate)<sub>2</sub></b>                        |                                           |                                           |                                           |
| ZORA/Scalar                                           | 6723                                      | 6959                                      | 8741                                      |
| Nonrelativistic                                       | 7366                                      | 7439                                      | 8880                                      |
| <b>HgF<sub>2</sub></b>                                |                                           |                                           |                                           |
| ZORA/Scalar                                           | 7821                                      | 7821                                      | 7822                                      |
| Nonrelativistic                                       | 8158                                      | 8159                                      | 8159                                      |
| <b>HgCl<sub>2</sub></b>                               |                                           |                                           |                                           |
| ZORA/Scalar                                           | 6499                                      | 6500                                      | 8676                                      |
| Nonrelativistic                                       | 6593                                      | 6593                                      | 8820                                      |
| <b>HgBr<sub>2</sub></b>                               |                                           |                                           |                                           |
| ZORA/Scalar                                           | 6356                                      | 6358                                      | 8380                                      |
| Nonrelativistic                                       | 6411                                      | 6413                                      | 8563                                      |
| <b>HgI<sub>2</sub></b>                                |                                           |                                           |                                           |
| ZORA/Scalar                                           | 5810                                      | 5814                                      | 5863                                      |
| Nonrelativistic                                       | 6298                                      | 6300                                      | 6378                                      |
| <b>Hg<sub>2</sub>Cl<sub>2</sub></b>                   |                                           |                                           |                                           |
| ZORA/Scalar <u>Hg(1)</u>                              | 6499                                      | 6500                                      | 8676                                      |
| ZORA/Scalar <u>Hg(2)</u>                              | 6496                                      | 6497                                      | 8676                                      |
| Nonrelativistic <u>Hg(1)</u>                          | 6593                                      | 6593                                      | 8820                                      |
| Nonrelativistic <u>Hg(2)</u>                          | 6593                                      | 6593                                      | 8821                                      |
| <b>K[Hg(SCN)<sub>3</sub>]</b>                         |                                           |                                           |                                           |
| FCA/TZP                                               | 5687                                      | 5781                                      | 7047                                      |
| FCA/DZ                                                | 6088                                      | 6276                                      | 7454                                      |
| <b>Hg<sub>2</sub>(H<sub>2</sub>O)·2NO<sub>3</sub></b> |                                           |                                           |                                           |
| ZORA/Scalar <u>Hg(1)</u>                              | 7151                                      | 7165                                      | 9061                                      |
| ZORA/Scalar <u>Hg(2)</u>                              | 7086                                      | 7181                                      | 9063                                      |
| Nonrelativistic <u>Hg(1)</u>                          | 7028                                      | 7145                                      | 9084                                      |
| Nonrelativistic <u>Hg(2)</u>                          | 7027                                      | 7145                                      | 9083                                      |
